# Supplementary material for: Autoantibodies Against the Complement Regulator Factor H in the Serum of Patients With Neuromyelitis Optica Spectrum Disorder
Source: PubMed Central journal article supplement (PMC8111293; doi:10.3389/fimmu.2021.660382), 2021-04-27
Supplement: DataSheet_1.pdf [file DataSheet_1.pdf]

*Supplementary Material*

A

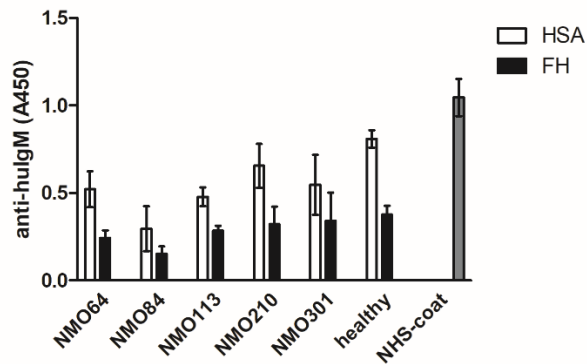

B

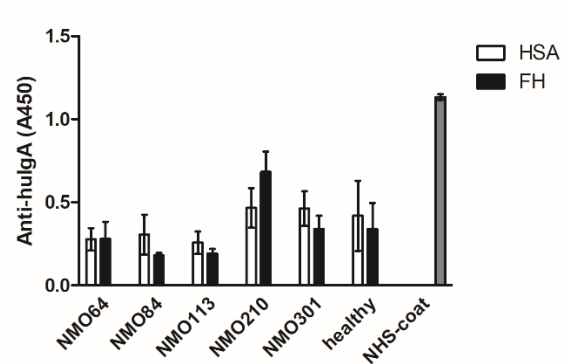

**Supplementary Figure 1.** IgM and IgA class FH autoantibodies in NMOSD patients. To assess the presence of other classes of FH autoantibodies, IgG was depleted from patients' sera using protein G beads. Depleted serum samples were added to microplate wells coated with HSA or FH and autoantibody binding was detected using HRP-conjugated anti-human IgM (A) or HRP-conjugated anti-human IgA (B). Normal human serum was immobilized as a technical control. Data are means of two experiments.

A

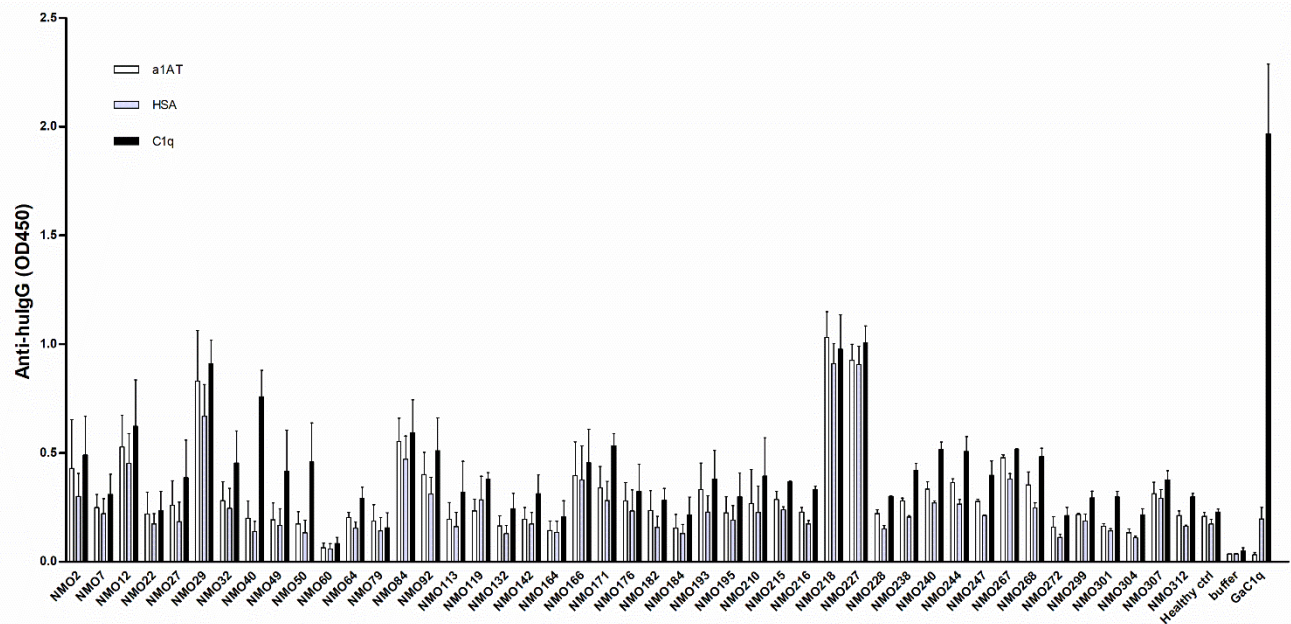

B

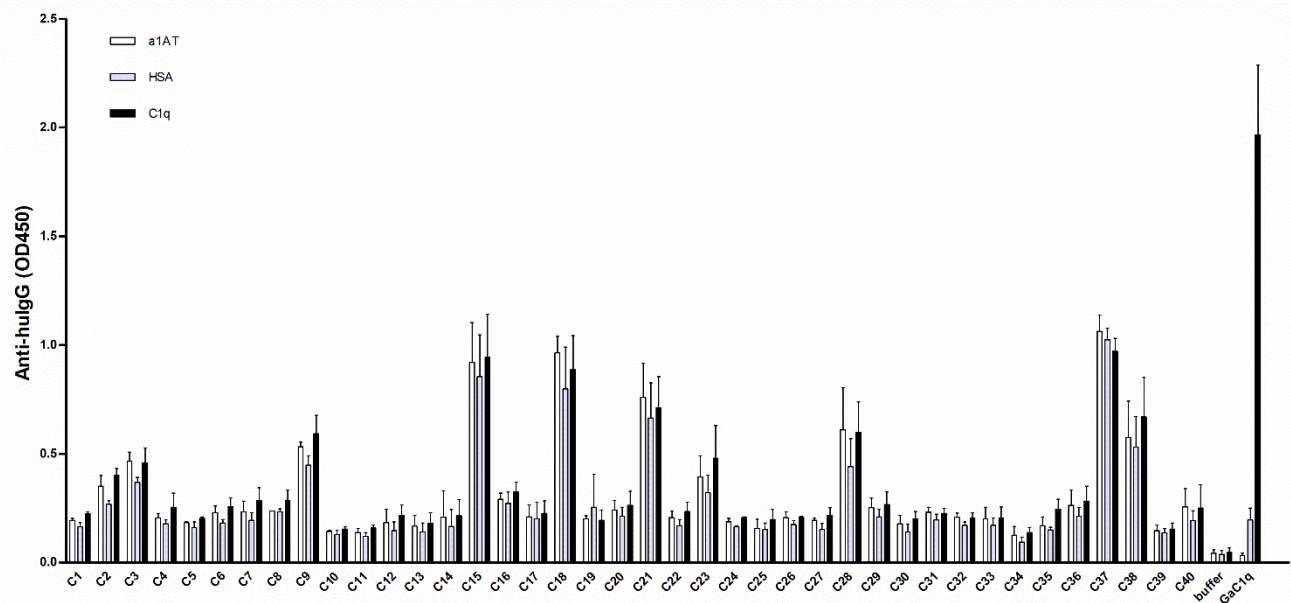

**Supplementary Figure 2.** Screening the NMOSD sera and healthy control samples for autoantibodies against C1q. Microplate wells were coated with C1q and, as negative controls, human serum albumin (HSA) and  $\alpha$ 1-antitrypsin (a1aT). After blocking, serum samples of (A) NMOSD patients and (B) that of healthy controls were added, and autoantibodies were detected by HRP-conjugated anti-human IgG. To exclude unspecific binding due to the “stickiness” of C1q, serum samples and the detecting antibodies were diluted in DPBS containing 1 M NaCl, which does not influence antigen-antibody binding. As a control, goat anti-C1q (GaC1q) and HRP-conjugated rabbit anti-goat Ig antibody were also used. Data are means  $\pm$  SD of three experiments.
